# Supplementary material for: splitSMLM, a spectral demixing method for high-precision multi-color localization microscopy applied to nuclear pore complexes
Source: PubMed Central journal article supplement (PMC9576791; doi:10.1038/s42003-022-04040-1), 2022-10-17
Supplement: 42003_2022_4040_MOESM3_ESM.pdf [file 42003_2022_4040_MOESM3_ESM.pdf]

## Description of Additional Supplementary Files

**File name:** Supplementary Data 1

**Description:** The source data behind the graphs in the paper.
